# Supplementary material for: Experimental evidence for the molecular molybdenum fluorides MoF to MoF6: a matrix isolation and DFT investigation
Source: Royal Society of Chemistry journal article supplement (doi:10.1039/d1nj06062g), 2022-01-01
Supplement: d1nj06062g1.pdf [file d1nj06062g1.pdf]

## Experimental Evidence for the Molecular Molybdenum Fluorides MoF to MoF<sub>6</sub>: a matrix isolation and DFT investigation.

Ahmed K. Sakr,<sup>(a)</sup> Howard V. Snelling,<sup>(b)</sup> and Nigel A. Young<sup>(a)\*</sup>

(a) Department of Chemistry and Biochemistry, The University of Hull, Kingston upon Hull, HU6 7RX, U.K.

(b) Department of Physics and Mathematics, The University of Hull, Kingston upon Hull, HU6 7RX, U.K.

email: n.a.young@hull.ac.uk

## Electronic Supplementary Information

### Contents - Figures

**Figure ESI-1.** Badger's rule ( $r = (C/k)^{1/3} + d$ ) plot of Mo-F bond length  $r$  vs  $(1/k)^{1/3}$  for principal force constant  $f_r$  (left) and for the force constant derived from the totally symmetric mode  $f_{tot\ symm}$  (right).

**Figure ESI-2.** Higher resolution ( $1.0\text{ cm}^{-1}$ ) FTIR spectra of reaction products of atomic Mo in 1%  $\text{F}_2/\text{Ar}$  matrix with (a) the heated filament protected from  $\text{F}_2$  using the Cu disc after deposition and annealing to 15 K, 20 and 25 K; and (b) without Cu disc after deposition; calculated (B3LYP/def2tzvpp) and scaled spectra for  $\text{MoF}_6$  at (c)  $0.5\text{ cm}^{-1}$ , (d)  $1\text{ cm}^{-1}$  and  $2\text{ cm}^{-1}$  fwhm.

**Figure ESI-3.** FTIR spectra of reaction products of atomic Mo in 0.2%  $\text{F}_2/\text{Ar}$  matrix (a) after deposition; (b) after 10 mins visible light photolysis; (c) after 10 mins 200–410 nm photolysis; (d) after 10 mins broadband photolysis; (e) after further 10 mins visible light photolysis; (f) after 5 mins annealing at 15 K; (g) after 5 mins annealing at 20 K; (h) after 5 mins annealing at 25 K; (i) after 5 mins annealing at 30 K.

**Figure ESI-4.** FTIR absorbance and difference spectra of reaction products of atomic Mo in 0.2%  $\text{F}_2/\text{Ar}$  matrix (a) after deposition; (b) after 5 mins annealing at 15 K; (c) after 5 mins annealing at 20 K; (d) after 5 mins annealing at 25 K; (e) after 10 mins visible light photolysis; (f) after 10 mins 200–410 nm photolysis; (g) after 10 mins broadband photolysis; (h) after further 10 mins visible light photolysis; (i) after 5 mins annealing at 25 K; (j) after 5 mins annealing at 30 K.

**Figure ESI-5.** FTIR absorbance and difference spectra of reaction products of atomic Mo in 2%  $\text{F}_2/\text{Ar}$  matrix (a) after deposition; (b) after 10 mins visible light photolysis; (c) after 10 mins 200–410 nm photolysis; (d) after 10 mins broadband photolysis; (e) after further 10 mins visible light photolysis; (f) after 5 mins annealing at 15 K; (g) after 5 mins annealing at 20 K; (h) after 5 mins annealing at 25 K; (i) after 5 mins annealing at 30 K.

**Figure ESI-6.** FTIR absorbance and difference spectra of reaction products of atomic Mo in 2%  $\text{F}_2/\text{Ar}$  matrix (a) after deposition; (b) after 5 mins annealing at 15 K; (c) after 5 mins annealing at 20 K; (d) after 5 mins annealing at 25 K; (e) after 10 mins visible light photolysis; (f) after 10 mins 200–410 nm photolysis; (g) after 10 mins broadband photolysis; (h) after further 10 mins visible light photolysis; (i) after 5 mins annealing at 25 K; (j) after 5 mins annealing at 30 K.

**Figure ESI-7.** Higher resolution ( $1.0\text{ cm}^{-1}$ ) FTIR spectra of reaction products of atomic Mo (heated filament protected from  $\text{F}_2$  using the Cu disc) in (a) 1%  $\text{F}_2/\text{Ar}$  matrix after deposition, broadband photolysis and annealing to 15 K, 20 and 25 K; (b) in 2%  $\text{F}_2/\text{Ar}$  matrix; and calculated (B3LYP/def2tzvpp) and scaled spectra for (c)  $\text{MoF}_5$ ; (d)  $\text{MoF}_4$ ; and (e)  $\text{MoF}_3$  at  $0.5\text{ cm}^{-1}$  fwhm. Experimental features due to  $\text{MoF}_6$  and  $\text{MoF}_2$  are marked.

**Figure ESI-8.** FTIR spectra of reaction products of atomic Mo in 0.5%  $\text{F}_2/\text{Ar}$  matrix with the heated filament not protected from  $\text{F}_2$  exposure: (a) after deposition; (b) after 10 mins visible light photolysis; (c) after 10 mins 200–410 nm photolysis; (d) after 10 mins broadband photolysis; (e) after further 10 mins visible light photolysis; (f) after 5 mins annealing at 15 K; (g) after 5 mins annealing at 20 K; (h) after 5 mins annealing at 25 K; (i) after 5 mins annealing at 30 K.

## Contents - Tables

**Table ESI-1.** Calculated (B3LYP/def2tzvpp) geometries, vibrational modes and SVFF force constants of molybdenum fluoride molecules.

**Table ESI-2.** Calculated (B3LYP/def2tzvpp) vibrational modes and SVFF  $F$  and  $G$  matrix elements and principal force constants ( $f_r$ ) and interaction force constants ( $f_{rr}$  and  $f_{rr}'$ ) derived from them.

**Table ESI-3.** Comparison of MoF<sub>6</sub> force constants

**Table ESI-4.** Cartesian coordinates and energies of minimised structures at the B3LYP/def2tzvpp level. (No negative frequencies were reported for these structures)

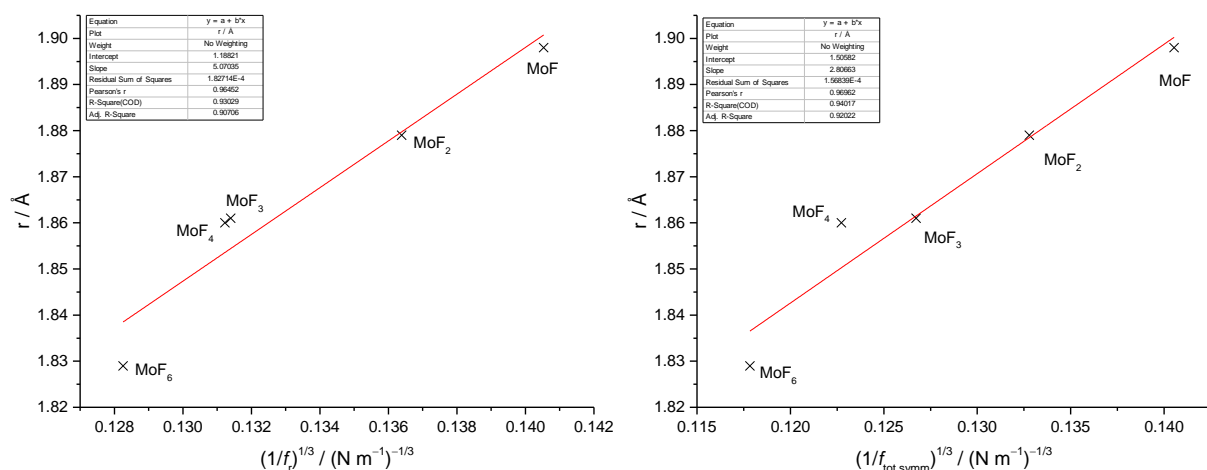

Figure ESI-1. Badger's rule ( $(r = (C/k)^{1/3} + d)$ ) plot of Mo-F bond length  $r$  vs  $(1/k)^{1/3}$  for principal force constant  $f_r$  (left) and for the force constant derived from the totally symmetric mode  $f_{tot\ symm}$  (right).

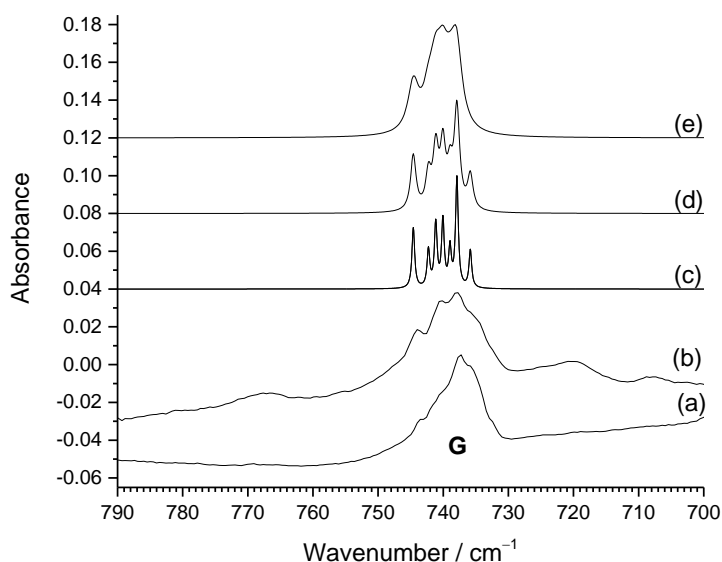

Figure ESI-2. Higher resolution ( $1.0\text{ cm}^{-1}$ ) FTIR spectra of reaction products of atomic Mo in 1%  $\text{F}_2/\text{Ar}$  matrix with (a) the heated filament protected from  $\text{F}_2$  using the Cu disc after deposition and annealing to 15 K, 20 and 25 K; and (b) without Cu disc after deposition; calculated (B3LYP/def2tzvp) and scaled spectra for  $\text{MoF}_6$  at (c)  $0.5\text{ cm}^{-1}$ , (d)  $1\text{ cm}^{-1}$  and  $2\text{ cm}^{-1}$  fwhm.

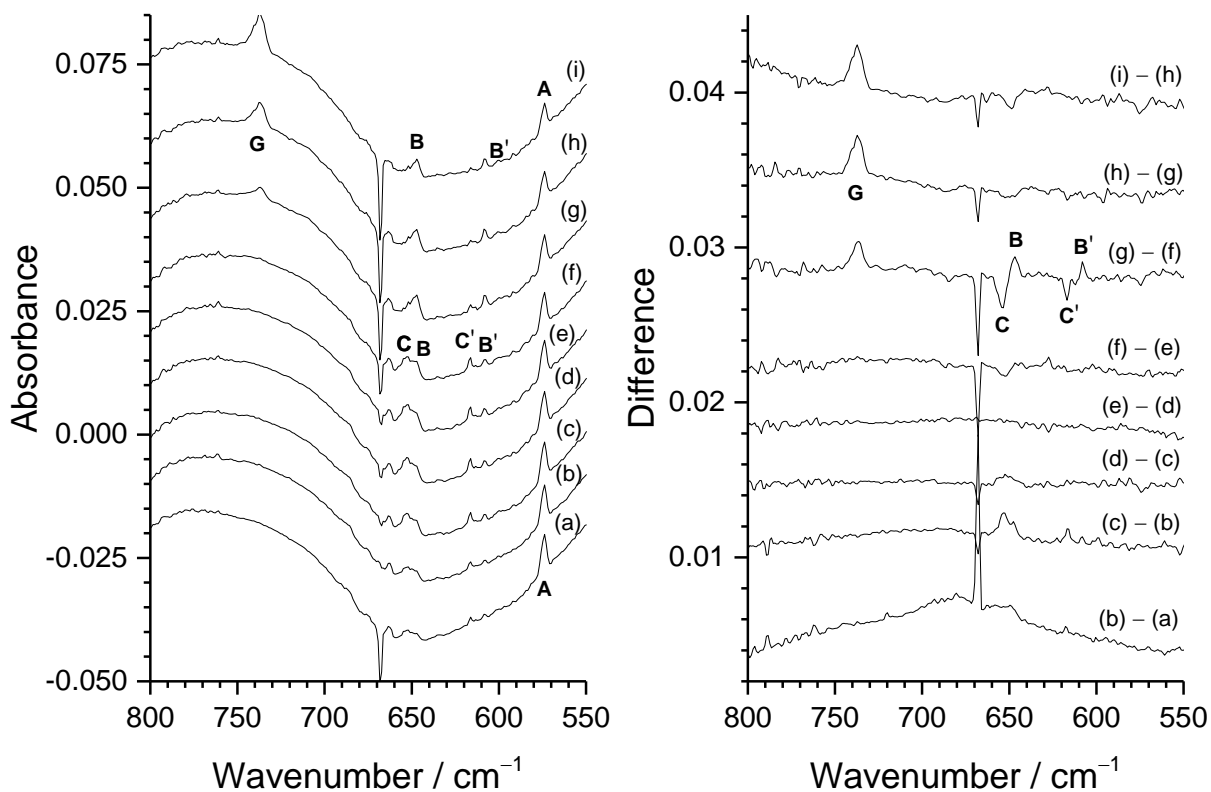

Figure ESI-3. FTIR spectra of reaction products of atomic Mo in 0.2% F<sub>2</sub>/Ar matrix (a) after deposition; (b) after 10 mins visible light photolysis; (c) after 10 mins 200–410 nm photolysis; (d) after 10 mins broadband photolysis; (e) after further 10 mins visible light photolysis; (f) after 5 mins annealing at 15 K; (g) after 5 mins annealing at 20 K; (h) after 5 mins annealing at 25 K; (i) after 5 mins annealing at 30 K.

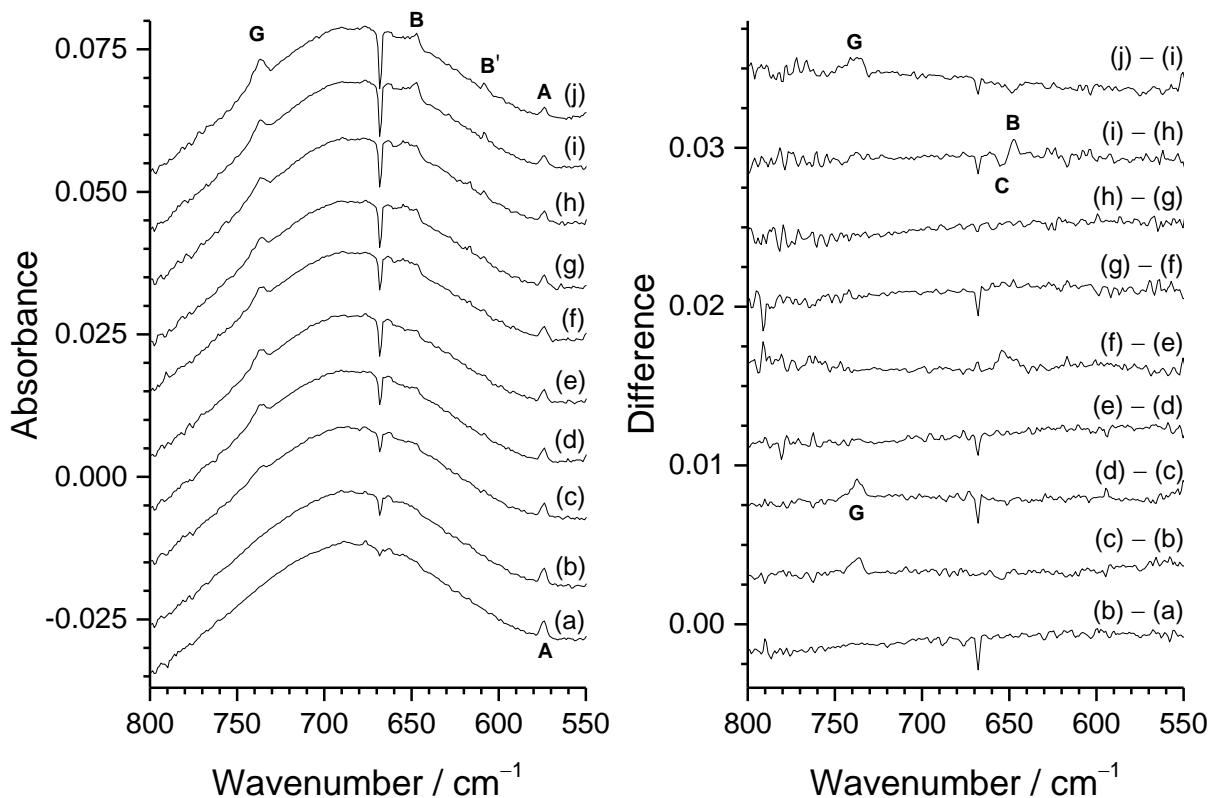

Figure ESI-4. FTIR absorbance and difference spectra of reaction products of atomic Mo in 0.2% F<sub>2</sub>/Ar matrix (a) after deposition; (b) after 5 mins annealing at 15 K; (c) after 5 mins annealing at 20 K; (d) after 5 mins annealing at 25 K; (e) after 10 mins visible light photolysis; (f) after 10 mins 200–410 nm photolysis; (g) after 10 mins broadband photolysis; (h) after further 10 mins visible light photolysis; (i) after 5 mins annealing at 25 K; (j) after 5 mins annealing at 30 K.

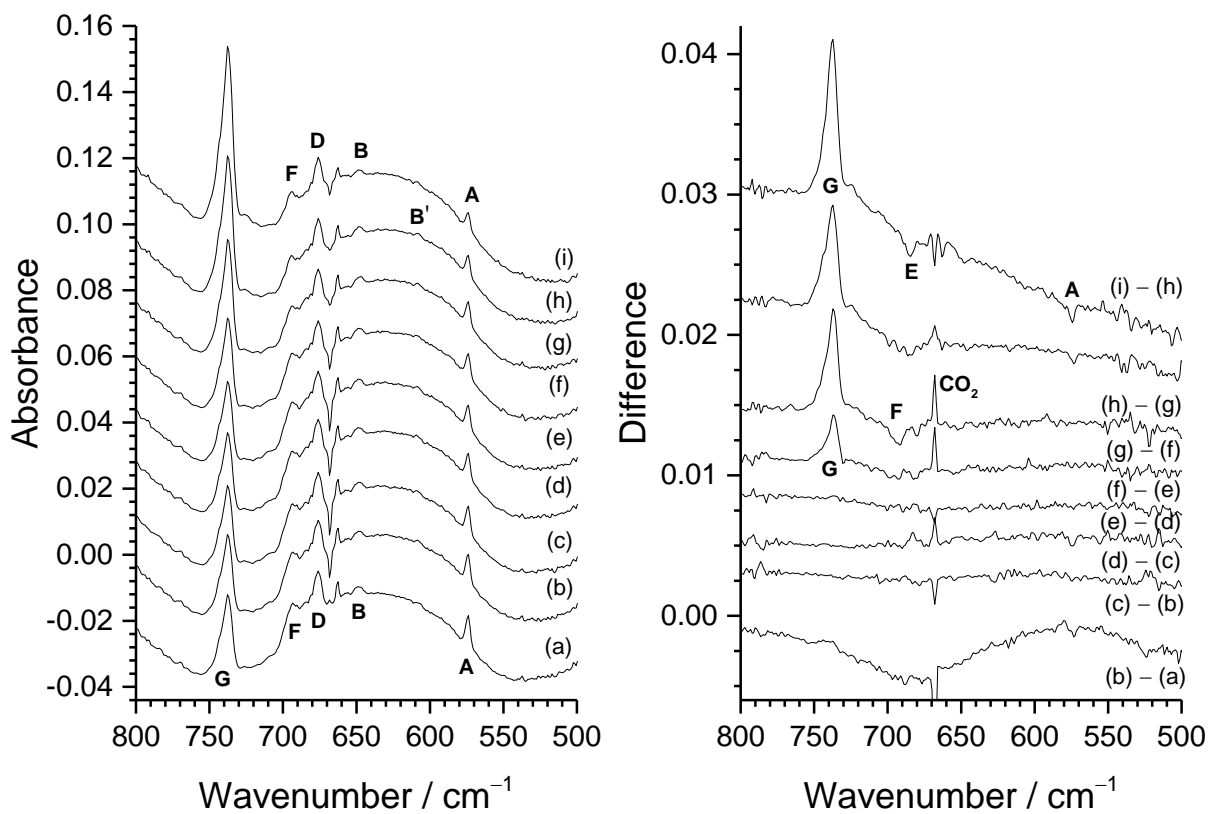

Figure ESI-5. FTIR absorbance and difference spectra of reaction products of atomic Mo in 2% F<sub>2</sub>/Ar matrix (a) after deposition; (b) after 10 mins visible light photolysis; (c) after 10 mins 200–410 nm photolysis; (d) after 10 mins broadband photolysis; (e) after further 10 mins visible light photolysis; (f) after 5 mins annealing at 15 K; (g) after 5 mins annealing at 20 K; (h) after 5 mins annealing at 25 K; (i) after 5 mins annealing at 30 K.

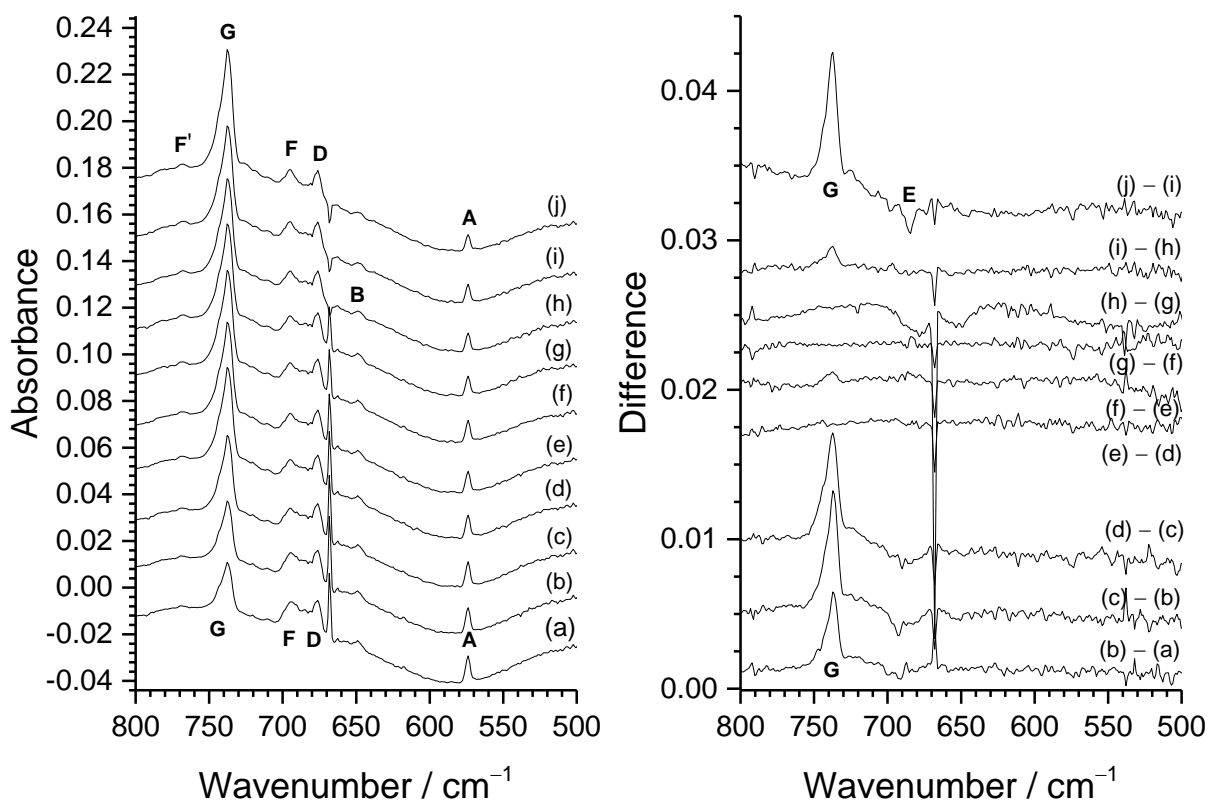

Figure ESI-6. FTIR absorbance and difference spectra of reaction products of atomic Mo in 2% F<sub>2</sub>/Ar matrix (a) after deposition; (b) after 5 mins annealing at 15 K; (c) after 5 mins annealing at 20 K; (d) after 5 mins annealing at 25 K; (e) after 10 mins visible light photolysis; (f) after 10 mins 200–410 nm photolysis; (g) after 10 mins broadband photolysis; (h) after further 10 mins visible light photolysis; (i) after 5 mins annealing at 25 K; (j) after 5 mins annealing at 30 K.



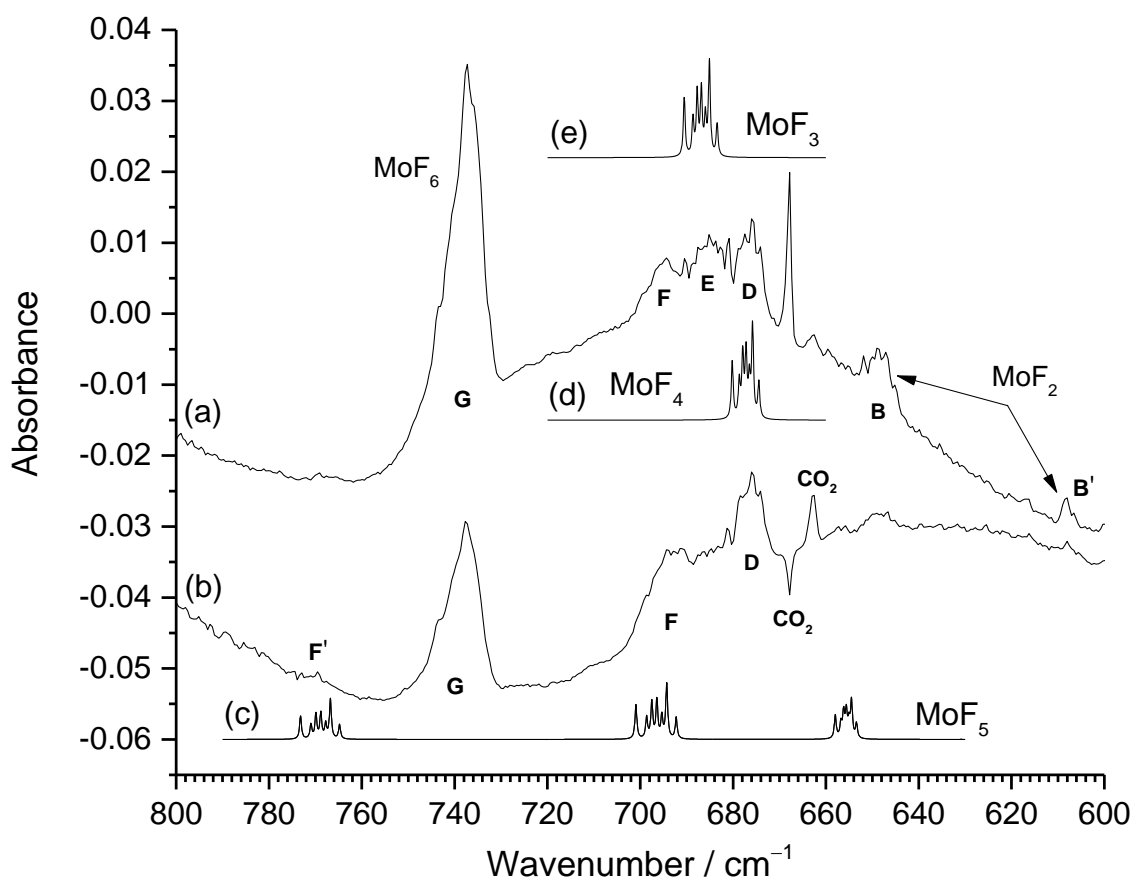

Figure ESI-7. Higher resolution ( $1.0\text{ cm}^{-1}$ ) FTIR spectra of reaction products of atomic Mo (heated filament protected from  $\text{F}_2$  using the Cu disc) in (a) 1%  $\text{F}_2/\text{Ar}$  matrix after deposition, broadband photolysis and annealing to 15 K, 20 and 25 K; (b) in 2%  $\text{F}_2/\text{Ar}$  matrix; and calculated (B3LYP/def2tzvpp) and scaled spectra for (c)  $\text{MoF}_5$ ; (d)  $\text{MoF}_4$ ; and (e)  $\text{MoF}_3$  at  $0.5\text{ cm}^{-1}$  fwhm. Experimental features due to  $\text{MoF}_6$  and  $\text{MoF}_2$  are marked.

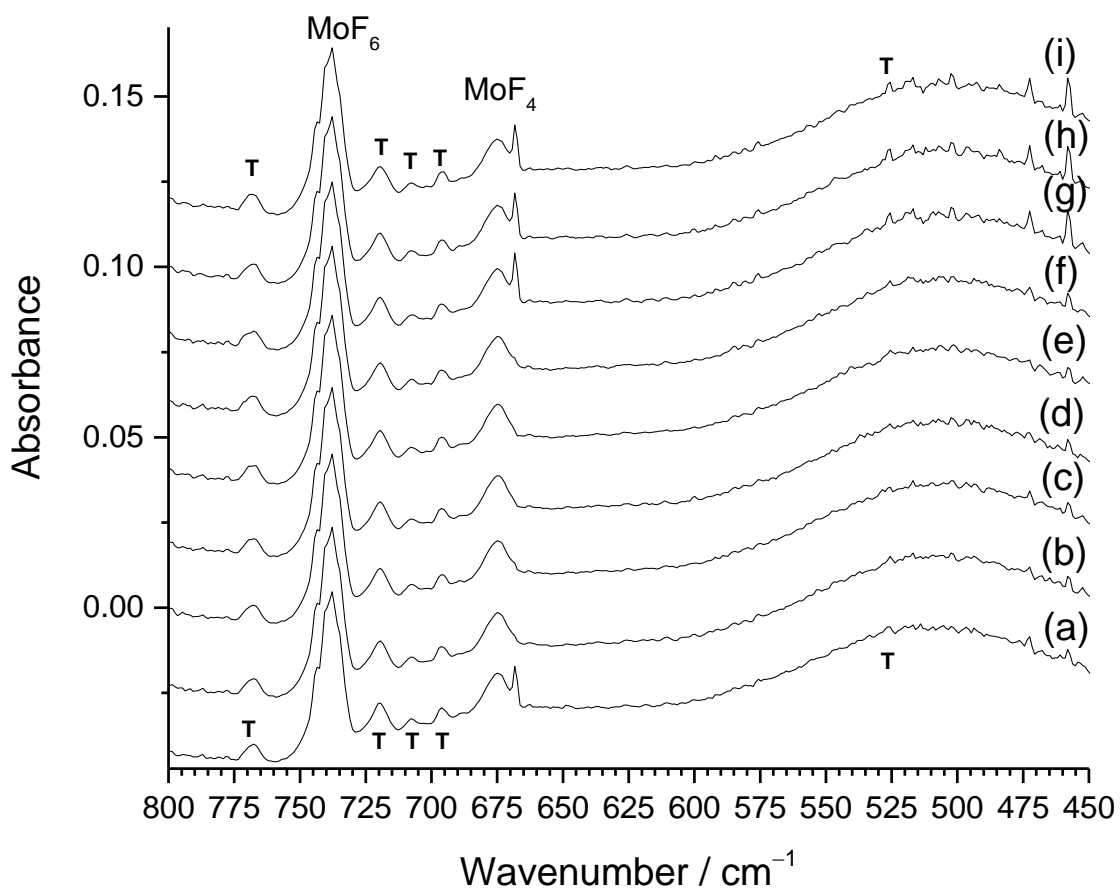

Figure ESI-8. FTIR spectra of reaction products of atomic Mo in 0.5% F<sub>2</sub>/Ar matrix with the heated filament not protected from F<sub>2</sub> exposure: (a) after deposition; (b) after 10 mins visible light photolysis; (c) after 10 mins 200–410 nm photolysis; (d) after 10 mins broadband photolysis; (e) after further 10 mins visible light photolysis; (f) after 5 mins annealing at 15 K; (g) after 5 mins annealing at 20 K; (h) after 5 mins annealing at 25 K; (i) after 5 mins annealing at 30 K.

Table ESI-1. Calculated (B3LYP/def2tzvpp) geometries, vibrational modes and SVFF force constants of molybdenum fluoride molecules.

| Assignments      | Molecular structure                         | Electronic ground state | Mo-F Bond length /Å                                                | F-Mo-F Bond angles                                                                                             | Vibrational modes $\text{cm}^{-1}$<br>(IR intensity / $\text{km mole}^{-1}$ )                                                                                                                                                                                                         | Force constants $\text{N m}^{-1}$                      |
|------------------|---------------------------------------------|-------------------------|--------------------------------------------------------------------|----------------------------------------------------------------------------------------------------------------|---------------------------------------------------------------------------------------------------------------------------------------------------------------------------------------------------------------------------------------------------------------------------------------|--------------------------------------------------------|
| MoF <sub>6</sub> | Octahedral ( $O_h$ )                        | $^1A_{1g}$              | 1.829                                                              | 90°                                                                                                            | A <sub>1g</sub> 739.0 (0.00)<br>T <sub>1u</sub> 734.2 (339 x 3)<br>E <sub>g</sub> 644.2 (0.00 x 2)<br>T <sub>2g</sub> 307.6 (0.00 x 3)<br>T <sub>1u</sub> 256.5 (33.2 x 3)<br>T <sub>2u</sub> 118.7 (0.00 x 3)                                                                        | $f_r = 474.0$<br>$f_{rr} = 24.46$<br>$f_{rr'} = 39.38$ |
| MoF <sub>5</sub> | Distorted trigonal bipyramidal ( $C_{1v}$ ) | $^2A$                   | 1.801 (eq)<br>1.819 (eq)<br>1.822 (eq)<br>1.876 (ax)<br>1.876 (ax) | 110.5° (eq)<br>125.8° (eq)<br>123.7° (eq)<br>179.4° (ax)<br>90.0°<br>90.2°<br>89.7°<br>90.0°<br>90.2°<br>89.7° | 761.5 (244) (eq str)<br>726.8 (0.004) (sym str breathing mode)<br>689.5 (355) (axial asymmetric str)<br>650.0 (228) (eq str)<br>626.5 (0.066) (asym str breathing mode)<br>278.1 (7.89)<br>236.3 (8.58)<br>217.1 (18.9)<br>211.2 (0.40)<br>193.3 (28.9)<br>90.1 (8.61)<br>31.7 (32.1) |                                                        |
| MoF <sub>4</sub> | Tetrahedral ( $T_d$ )                       | $^3A_2$                 | 1.860                                                              | 109.47°                                                                                                        | A <sub>1</sub> 695.2 (0.00)<br>T <sub>2</sub> 678.8 (186 x 3)<br>E 138.5 (0.00 x 2)<br>T <sub>2</sub> 124.9 (32.3 x 3)                                                                                                                                                                | $f_r = 442.5$<br>$f_{rr} = 32.81$                      |
| MoF <sub>3</sub> | Trigonal planar ( $D_{3h}$ )                | $^4A_2'$                | 1.861                                                              | 120°                                                                                                           | E' 692.3 (198 x 2)<br>A <sub>1</sub> ' 662.6 (0.000)<br>E' 176.8 (7.11 x 2)<br>A <sub>2</sub> '' 142.1 (16.6)                                                                                                                                                                         | $f_r = 440.8$<br>$f_{rr} = 25.30$                      |
| MoF <sub>2</sub> | Bent ( $C_{2v}$ )                           | $^5B_2$                 | 1.879                                                              | 132°                                                                                                           | B <sub>2</sub> 665.5 (198)<br>A <sub>1</sub> 635.0 (59.5)<br>A <sub>1</sub> 151.6 (8.84)                                                                                                                                                                                              | $f_r = 394.2$<br>$f_{rr} = 32.89$                      |
| MoF              | ( $C_{\infty v}$ )                          | $^6\Sigma^+$            | 1.898                                                              |                                                                                                                | $\Sigma^+$ 620.1 (148)                                                                                                                                                                                                                                                                | $f_r = 360.3$                                          |

Table ESI-2. Calculated (B3LYP/def2tzvpp) vibrational modes and SVFF  $F$  and  $G$  matrix elements and principal force constants ( $f_r$ ) and interaction force constants ( $f_{rr}$  and  $f_{rr}'$ ) derived from them.

|                  | mode             | B3LYP<br>def2tzvpp<br>$\nu_{\text{Mo-F}}$<br>$\text{cm}^{-1}$ | $G$ matrix elements*                       | $G$<br>$\text{g}^{-1}$ | $F$<br>$\text{N m}^{-1}$ | $F$ matrix<br>elements    | $f_r$<br>$\text{N m}^{-1}$ | $f_{rr}$<br>$\text{N m}^{-1}$ | $f_{rr}'$<br>$\text{N m}^{-1}$ |
|------------------|------------------|---------------------------------------------------------------|--------------------------------------------|------------------------|--------------------------|---------------------------|----------------------------|-------------------------------|--------------------------------|
| MoF              | $\Sigma^+$       | 620.0                                                         | $\mu_F + \mu_{\text{Mo}}$                  | 0.062850               | 360.3                    | $f_r$                     | 360.3                      |                               |                                |
| MoF <sub>2</sub> | A <sub>1</sub>   | 635.0                                                         | $\mu_F + \mu_{\text{Mo}}(1 + \cos \alpha)$ | 0.055628               | 427.1                    | $f_r + f_{rr}$            | 394.2                      | 32.89                         |                                |
|                  | B <sub>2</sub>   | 655.5                                                         | $\mu_F + \mu_{\text{Mo}}(1 - \cos \alpha)$ | 0.070072               | 361.3                    | $f_r - f_{rr}$            | 394.2                      | 32.89                         |                                |
| MoF <sub>3</sub> | A <sub>1</sub> ' | 662.6                                                         | $\mu_F$                                    | 0.052636               | 491.4                    | $f_r + 2f_{rr}$           | 440.8                      | 25.30                         |                                |
|                  | E'               | 692.3                                                         | $\mu_F + (3/2)\mu_{\text{Mo}}$             | 0.067957               | 415.5                    | $f_r - f_{rr}$            | 440.8                      | 25.30                         |                                |
| MoF <sub>4</sub> | A <sub>1</sub>   | 695.2                                                         | $\mu_F$                                    | 0.052636               | 541.0                    | $f_r + 3f_{rr}$           | 442.5                      | 32.81                         |                                |
|                  | T <sub>2</sub>   | 678.8                                                         | $\mu_F + (4/3)\mu_{\text{Mo}}$             | 0.066255               | 409.7                    | $f_r - f_{rr}$            | 442.5                      | 32.81                         |                                |
| MoF <sub>6</sub> | A <sub>1g</sub>  | 739.0                                                         | $\mu_F$                                    | 0.052636               | 611.3                    | $f_r + 4f_{rr} + f_{rr}'$ | 474.0                      | 24.46                         | 39.38                          |
|                  | E <sub>g</sub>   | 644.2                                                         | $\mu_F$                                    | 0.052636               | 464.5                    | $f_r - 2f_{rr} + f_{rr}'$ | 474.0                      | 24.46                         | 39.38                          |
|                  | T <sub>1u</sub>  | 734.2                                                         | $\mu_F + 2\mu_{\text{Mo}}$                 | 0.073064               | 434.7                    | $f_r - f_{rr}'$           | 474.0                      | 24.46                         | 39.38                          |

\*  $\mu_F$  and  $\mu_{\text{Mo}}$  are the reciprocal masses of  $^{19}\text{F}$  and  $^{98}\text{Mo}$ .  $F = ((\nu/130.283)^2/G)$ .  $f_r$  is the principal force constant and  $f_{rr}$  the interaction force constant. For MoF<sub>6</sub>,  $f_{rr}$  is the interaction force constant for the stretching modes *cis* to each other, and  $f_{rr}'$  for those *trans* to each other. (K. Nakamoto, *Infrared and Raman Spectra of Inorganic and Coordination Compounds: Part A: Theory and Applications in Inorganic Chemistry, Sixth Edition*, John Wiley & Sons, Inc., 2008.)

Table ESI-3. Comparison of MoF<sub>6</sub> force constants

| $f_r$ | $f_{rr}$ | $f_{rr}'$ | Ref |
|-------|----------|-----------|-----|
| 474.0 | 24.5     | 39.4      | (a) |
| 508.0 | 24.6     | 4.0       | (b) |
| 473   | 24.4     | 35        | (c) |
| 494   | 23       | 29        | (d) |
| 508.3 | 25.33    | 5.0       | (e) |

(a) this work

(b) C. W. F. T. Pistorius, *J. Chem. Phys.*, 1958, **29**, 1328-1332.

(c) H. H. Claassen, *J. Chem. Phys.*, 1959, **30**, 968-972.

(d) R. S. McDowell, R. J. Sherman, L. B. Asprey and R. C. Kennedy, *J. Chem. Phys.*, 1975, **62**, 3974-3978.

(e) F. Ucun and M. G. Şengül, *Z. Naturforsch., A: Phys. Sci.*, 2005, **60**, 819-822.

Table ESI-4. Cartesian coordinates and energies of minimised structures at the B3LYP/def2tzvpp.  
(No negative frequencies were reported for these structures)

MoF  ${}^6\Sigma^+$

| Centre Number | Atomic Number | Atomic Type | Coordinates (Å) |          |           |
|---------------|---------------|-------------|-----------------|----------|-----------|
|               |               |             | X               | Y        | Z         |
| 1             | 42            | 0           | 0.000000        | 0.000000 | 0.334978  |
| 2             | 9             | 0           | 0.000000        | 0.000000 | -1.563229 |

E(UB3LYP) = -168.075224090 h

Zero-point correction= 0.001413 (Hartree/Particle)

Thermal correction to Energy= 0.003922

Thermal correction to Enthalpy= 0.004867

Thermal correction to Gibbs Free Energy= -0.023251

Sum of electronic and zero-point Energies= -168.073811

Sum of electronic and thermal Energies= -168.071302

Sum of electronic and thermal Enthalpies= -168.070357

Sum of electronic and thermal Free Energies= -168.098476

MoF<sub>2</sub>  ${}^5B_2$

| Centre Number | Atomic Number | Atomic Type | Coordinates (Å) |           |           |
|---------------|---------------|-------------|-----------------|-----------|-----------|
|               |               |             | X               | Y         | Z         |
| 1             | 42            | 0           | 0.000000        | 0.000000  | 0.229137  |
| 2             | 9             | 0           | 0.000000        | -1.716548 | -0.534652 |
| 3             | 9             | 0           | 0.000000        | 1.716548  | -0.534652 |

E(UB3LYP) = -268.043295656 h

Zero-point correction= 0.003308 (Hartree/Particle)

Thermal correction to Energy= 0.007050

Thermal correction to Enthalpy= 0.007994

Thermal correction to Gibbs Free Energy= -0.025125

Sum of electronic and zero-point Energies= -268.039988

Sum of electronic and thermal Energies= -268.036245

Sum of electronic and thermal Enthalpies= -268.035301

Sum of electronic and thermal Free Energies= -268.068421

MoF<sub>3</sub> <sup>4</sup>A<sub>2</sub>'

| Centre Number | Atomic Number | Atomic Type | Coordinates (Å) |           |          |
|---------------|---------------|-------------|-----------------|-----------|----------|
|               |               |             | X               | Y         | Z        |
| 1             | 42            | 0           | 0.000000        | 0.000000  | 0.000000 |
| 2             | 9             | 0           | 0.000000        | 1.861323  | 0.000000 |
| 3             | 9             | 0           | -1.611953       | -0.930661 | 0.000000 |
| 4             | 9             | 0           | 1.611953        | -0.930661 | 0.000000 |

E(UB3LYP) = -368.016658598 h

Zero-point correction= 0.005793 (Hartree/Particle)

Thermal correction to Energy= 0.010839

Thermal correction to Enthalpy= 0.011783

Thermal correction to Gibbs Free Energy= -0.023698

Sum of electronic and zero-point Energies= -368.010866

Sum of electronic and thermal Energies= -368.005820

Sum of electronic and thermal Enthalpies= -368.004876

Sum of electronic and thermal Free Energies= -368.040357

MoF<sub>4</sub> <sup>3</sup>A<sub>2</sub>

| Centre Number | Atomic Number | Atomic Type | Coordinates (Å) |           |           |
|---------------|---------------|-------------|-----------------|-----------|-----------|
|               |               |             | X               | Y         | Z         |
| 1             | 42            | 0           | 0.000000        | 0.000000  | 0.000000  |
| 2             | 9             | 0           | 1.074031        | 1.074031  | 1.074031  |
| 3             | 9             | 0           | -1.074031       | -1.074031 | 1.074031  |
| 4             | 9             | 0           | -1.074031       | 1.074031  | -1.074031 |
| 5             | 9             | 0           | 1.074031        | -1.074031 | -1.074031 |

E(UB3LYP) = -467.956986927 h

Zero-point correction= 0.007708 (Hartree/Particle)

Thermal correction to Energy= 0.014410

Thermal correction to Enthalpy= 0.015355

Thermal correction to Gibbs Free Energy= -0.023433

Sum of electronic and zero-point Energies= -467.949279

Sum of electronic and thermal Energies= -467.942576

Sum of electronic and thermal Enthalpies= -467.941632

Sum of electronic and thermal Free Energies= -467.980419

MoF<sub>5</sub> <sup>2</sup>A

| Centre Number | Atomic Number | Atomic Type | Coordinates (Å) |           |           |
|---------------|---------------|-------------|-----------------|-----------|-----------|
|               |               |             | X               | Y         | Z         |
| 1             | 42            | 0           | 0.000050        | -0.029727 | 0.006652  |
| 2             | 9             | 0           | -0.000667       | 0.916429  | -1.550663 |
| 3             | 9             | 0           | -1.876054       | -0.023321 | 0.000535  |
| 4             | 9             | 0           | -0.000732       | 1.096769  | 1.435371  |
| 5             | 9             | 0           | 1.876194        | -0.021563 | 0.000498  |
| 6             | 9             | 0           | 0.001024        | -1.829588 | 0.083217  |

E(UB3LYP) = -567.878041967 h

Zero-point correction= 0.010735 (Hartree/Particle)

Thermal correction to Energy= 0.018388

Thermal correction to Enthalpy= 0.019333

Thermal correction to Gibbs Free Energy= -0.024005

Sum of electronic and zero-point Energies= -567.867307

Sum of electronic and thermal Energies= -567.859653

Sum of electronic and thermal Enthalpies= -567.858709

Sum of electronic and thermal Free Energies= -567.902047

MoF<sub>6</sub> <sup>1</sup>A<sub>1g</sub>

| Centre Number | Atomic Number | Atomic Type | Coordinates (Å) |           |           |
|---------------|---------------|-------------|-----------------|-----------|-----------|
|               |               |             | X               | Y         | Z         |
| 1             | 42            | 0           | 0.000000        | 0.000000  | 0.000000  |
| 2             | 9             | 0           | 0.000000        | 0.000000  | 1.829184  |
| 3             | 9             | 0           | 0.000000        | 1.829184  | 0.000000  |
| 4             | 9             | 0           | -1.829184       | 0.000000  | 0.000000  |
| 5             | 9             | 0           | 0.000000        | 0.000000  | -1.829184 |
| 6             | 9             | 0           | 0.000000        | -1.829184 | 0.000000  |
| 7             | 9             | 0           | 1.829184        | 0.000000  | 0.000000  |

E(RB3LYP) = -667.789350335 h

Zero-point correction= 0.014303 (Hartree/Particle)

Thermal correction to Energy= 0.022570

Thermal correction to Enthalpy= 0.023514

Thermal correction to Gibbs Free Energy= -0.016453

Sum of electronic and zero-point Energies= -667.775047

Sum of electronic and thermal Energies= -667.766781

Sum of electronic and thermal Enthalpies= -667.765837

Sum of electronic and thermal Free Energies= -667.805804



Mo  $^7S_3$

E(UB3LYP) = -68.1232861644

Zero-point correction= 0.000000 (Hartree/Particle)

Thermal correction to Energy= 0.001416

Thermal correction to Enthalpy= 0.002360

Thermal correction to Gibbs Free Energy= -0.018318

Sum of electronic and zero-point Energies= -68.123286

Sum of electronic and thermal Energies= -68.121870

Sum of electronic and thermal Enthalpies= -68.120926

Sum of electronic and thermal Free Energies= -68.141604

F<sub>2</sub>  $^1\Sigma_g^+$

| Centre Number | Atomic Number | Atomic Type | Coordinates (Å) |          |          |
|---------------|---------------|-------------|-----------------|----------|----------|
|               |               |             | X               | Y        | Z        |
| 1             | 9             | 0           | 3.446093        | 1.125828 | 0.000000 |
| 2             | 9             | 0           | 2.049536        | 1.125828 | 0.000000 |

E(RB3LYP) = -199.599540492 h

Zero-point correction= 0.002387 (Hartree/Particle)

Thermal correction to Energy= 0.004778

Thermal correction to Enthalpy= 0.005722

Thermal correction to Gibbs Free Energy= -0.017231

Sum of electronic and zero-point Energies= -199.597154

Sum of electronic and thermal Energies= -199.594763

Sum of electronic and thermal Enthalpies= -199.593819

Sum of electronic and thermal Free Energies= -199.616771

Ar  $^1S_0$

E(RB3LYP) = -527.549964127 h

Zero-point correction= 0.000000 (Hartree/Particle)

Thermal correction to Energy= 0.001416

Thermal correction to Enthalpy= 0.002360

Thermal correction to Gibbs Free Energy= -0.015212

Sum of electronic and zero-point Energies= -527.549964

Sum of electronic and thermal Energies= -527.548548

Sum of electronic and thermal Enthalpies= -527.547604

Sum of electronic and thermal Free Energies= -527.565176

ArMoF (linear)  ${}^6\Sigma^+$ 

| Centre Number | Atomic Number | Atomic Type | Coordinates (Å) |          |           |
|---------------|---------------|-------------|-----------------|----------|-----------|
|               |               |             | X               | Y        | Z         |
| 1             | 42            | 0           | 0.000000        | 0.000000 | 0.487129  |
| 2             | 9             | 0           | 0.000000        | 0.000000 | 2.399874  |
| 3             | 18            | 0           | 0.000000        | 0.000000 | -2.336572 |

E(UB3LYP) = -695.629297831 h

Zero-point correction= 0.001758 (Hartree/Particle)

Thermal correction to Energy= 0.006744

Thermal correction to Enthalpy= 0.007688

Thermal correction to Gibbs Free Energy= -0.029398

Sum of electronic and zero-point Energies= -695.627539

Sum of electronic and thermal Energies= -695.622554

Sum of electronic and thermal Enthalpies= -695.621610

Sum of electronic and thermal Free Energies= -695.658695

|                                      | $\Pi$   | $\Pi$   | $\Sigma^+$ | $\Sigma^+$ |
|--------------------------------------|---------|---------|------------|------------|
| Frequencies / $\text{cm}^{-1}$       | 36.6160 | 36.6160 | 97.8595    | 600.7694   |
| IR Intensity / $\text{km mole}^{-1}$ | 2.7210  | 2.7210  | 2.0407     | 158.5581   |

ArMoF (bent)  ${}^6A'$ 

| Centre Number | Atomic Number | Atomic Type | Coordinates (Å) |           |          |
|---------------|---------------|-------------|-----------------|-----------|----------|
|               |               |             | X               | Y         | Z        |
| 1             | 42            | 0           | 0.000000        | 0.488575  | 0.000000 |
| 2             | 9             | 0           | 0.140952        | 2.395452  | 0.000000 |
| 3             | 18            | 0           | -0.070476       | -2.337735 | 0.000000 |

E(UB3LYP) = -695.629388039 h

Zero-point correction= 0.001799 (Hartree/Particle)

Thermal correction to Energy= 0.006287

Thermal correction to Enthalpy= 0.007231

Thermal correction to Gibbs Free Energy= -0.027537

Sum of electronic and zero-point Energies= -695.627589

Sum of electronic and thermal Energies= -695.623101

Sum of electronic and thermal Enthalpies= -695.622157

Sum of electronic and thermal Free Energies= -695.656925

|                                      | $A'$    | $A'$    | $A'$     |
|--------------------------------------|---------|---------|----------|
| Frequencies / $\text{cm}^{-1}$       | 87.3607 | 97.8393 | 604.3087 |
| IR Intensity / $\text{km mole}^{-1}$ | 2.8508  | 1.9473  | 158.6219 |
